# Supplementary material for: Marek’s Disease Virus Infection Induced Mitochondria Changes in Chickens
Source: PubMed Central journal article supplement (PMC6651546; doi:10.3390/ijms20133150), 2019-06-27
Supplement: ijms-20-03150-s001.pdf [file ijms-20-03150-s001.pdf]

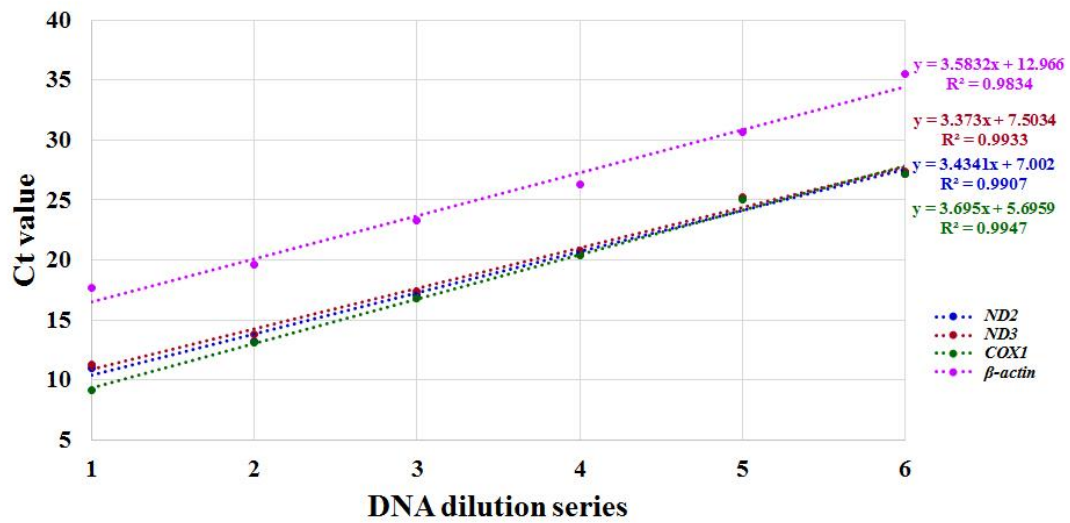

**Figure S1. Standard curves to estimate PCR efficiencies for one nuclear gene and four mitochondrial genes.** X-axis shows the DNA dilution series, from 1mg to 0.001ng. Y-axis is the cycle threshold (ct) value. The correlation coefficients were from 0.98 to 0.99 and the amplification efficiencies were 0.85 to 0.95.

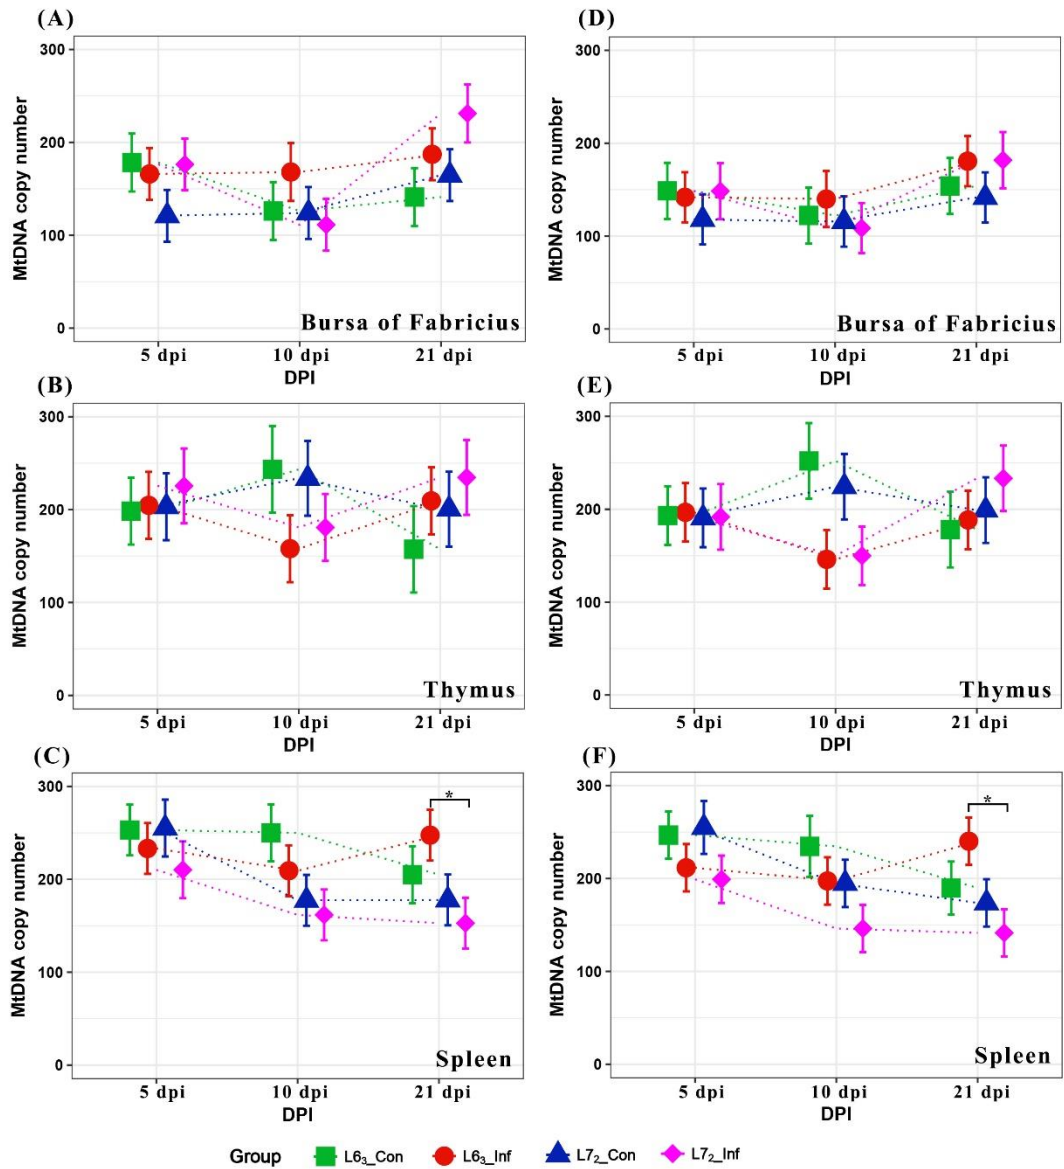

**Figure S2. MtDNA copy numbers (means± standard error) predicted with *ND3* and *COX1* against  $\beta$ -actin.** (A), (B) and (C) shows the variations generated by *ND3* against  $\beta$ -actin, and (D), (E) and (F) are the results generated by *COX1* against  $\beta$ -actin. Birds used in each group are five. The symbols \* and \*\* mean  $p \leq 0.05$  and  $p \leq 0.01$ , respectively, indicating significant differences between lines or treatments.

**Table S1. The differentially up- and down-regulated mitochondria-related nuclear genes among different comparisons in the three lymphoid organs.**

| Tissue             | Comparison subset            | No. of DEGs * | No. of up-regulated genes | No. of down-regulated genes | Up-regulated nuclear genes                                                                                                                                                                                                                                                                                                                                                                                                 | Down-regulated nuclear genes                                                                                                                                                                                                                                                                                                              |
|--------------------|------------------------------|---------------|---------------------------|-----------------------------|----------------------------------------------------------------------------------------------------------------------------------------------------------------------------------------------------------------------------------------------------------------------------------------------------------------------------------------------------------------------------------------------------------------------------|-------------------------------------------------------------------------------------------------------------------------------------------------------------------------------------------------------------------------------------------------------------------------------------------------------------------------------------------|
| Bursa of Fabricius | L6 <sub>3</sub> (Con vs Inf) | 15            | 9                         | 6                           | CKMT2, GATM, HSPB7, MSRB3, OBSCN, PDK4, PMP22, SLC25A4, UCP3                                                                                                                                                                                                                                                                                                                                                               | ABCB8, MPC2, MRPL17, NDUFB2, POLG2, TYSND1                                                                                                                                                                                                                                                                                                |
|                    | L7 <sub>2</sub> (Con vs Inf) | 106           | 57                        | 49                          | ABCB6, ABCB8, ACOT7, AGR2, AMT, BCL2, C15orf48, CLPP, CMPK2, COASY, COQ10B, COX14, CPT1A, CYP27A1, ECSIT, EFHD1, EHHADH, EPHX2, FKBP10, FPGS, GCDH, GPD2, GPX1, HEBP1, HINT2, HK2, IDH1, MAOA, MECR, MGST1, MRPL16, MRPL17, MRPL2, MRPL43, MRPL55, MRPS12, MSRB3, NDUFB7, NDUFS5, NDUFV1, NT5DC3, OGG1, OPA3, OSBPL1A, PARS2, PDK4, SLC25A29, SLC25A39, SLC25A44, STOM, STOML1, SUOX, TCIRG1, TIMM10, TOMM6, TYSND1, VDAC1 | ACSL4, AKAP1, AKAP10, ATXN2, BCL2L1, BID, CCT7, CHCHD4, CMC2, COMT, COMTD1, DHODH, DHTKD1, DNA2, DUT, FASTKD2, FDPS, FDX1, GDAP1, GLS, GSR, HSPD1, IBA57, IMMT, LAMC1, LONP1, MCCC1, MGME1, MIEF1, MINOS1, MLH1, MMADHC, MRPS10, MTG2, NDUFAF4, NDUFV2, OXCT1, PDK3, PDP2, PGS1, PIF1, PTCD3, RHOT1, SHMT1, TK2, TMEM65, UNG, UQCR11, VDR |
|                    | Con (L6 <sub>3</sub> )       | 57            | 5                         | 52                          | ABAT, ACSL4, COMTD1, PAK5, PIF1                                                                                                                                                                                                                                                                                                                                                                                            | ABCB8, ACOT9, AGR2, AMT, CHCHD10, CLPP,                                                                                                                                                                                                                                                                                                   |

|        |                                           |    |    |    |                                                                                                                                                                                                                            |                                                                                                                                                                                                                                                                                                                                                      |
|--------|-------------------------------------------|----|----|----|----------------------------------------------------------------------------------------------------------------------------------------------------------------------------------------------------------------------------|------------------------------------------------------------------------------------------------------------------------------------------------------------------------------------------------------------------------------------------------------------------------------------------------------------------------------------------------------|
|        | vs L7 <sub>2</sub> )                      |    |    |    |                                                                                                                                                                                                                            | COA3, COQ10B, COQ4, COX14, CPN2, DDAH1, ECSIT, FASTK, FOXRED1, FPGS, GCDH, GPX1, GPX4, HINT2, LAP3, MPC2, MPV17, MRPL16, MRPL17, MRPL2, MRPL24, MRPL41, MRPL43, MRPL55, MRPS12, MRPS34, NDUFA2, NDUFB2, NDUFB7, NDUFS5, NDUFV1, OGG1, OPA3, PRELID1, ROMO1, SCCPDH, SLC25A34, SLC25A39, SLC25A44, STOML1, SUOX, TDRKH, TIMM10, TIMM13, TOMM6, TYSND1 |
|        | Inf (L6 <sub>3</sub> vs L7 <sub>2</sub> ) | 56 | 30 | 26 | ALDH3A2, CPT1A, IDH1, MADD, SIRT3, PC, NDUFAF7, BCL2, EFHD1, MGST1, HK2, VDAC1, TSPO, HEBP1, EPHX2, TXNRD1, SLC25A29, EHHADH, C12orf10, TCIRG1, MECR, MAOA, OSBPL1A, ABCB6, STOM, CYP27A1, NT5DC3, STOML1, C15orf48, CMPK2 | OBSCN, GATM, UCP3, HSPB7, TK2, NUDT2, COX7C, SLC25A4, DUT, LAP3, FDPS, TDRKH, COMT, CHCHD10, MRPS31, IBA57, NTHL1, NDUFA4, UNG, SCCPDH, UQCRB, TMEM65, UQCR11, PDK3, DNA2, DBI                                                                                                                                                                       |
| Spleen | L6 <sub>3</sub> (Con vs Inf)              | 27 | 5  | 22 | ABAT, COQ9, COX11, POLG2, MAOA                                                                                                                                                                                             | ACSS3, AIFM2, BCL2, C3orf33, CPN2, CYP11A1, FKBP10, GPX1, HINT3, HSD17B4, LAP3, ME3, MRPL41, MRPS36, MSRB3, NDUFS4, NTHL1,                                                                                                                                                                                                                           |

|  |                              |     |     |    |                                                                                                                                                                                                                                                                                                                                                                                                                                                                                                                                                                                                                                                                                                                                                                                                                                                                                                                |                                                                                                                                                                                                                                                                                     |
|--|------------------------------|-----|-----|----|----------------------------------------------------------------------------------------------------------------------------------------------------------------------------------------------------------------------------------------------------------------------------------------------------------------------------------------------------------------------------------------------------------------------------------------------------------------------------------------------------------------------------------------------------------------------------------------------------------------------------------------------------------------------------------------------------------------------------------------------------------------------------------------------------------------------------------------------------------------------------------------------------------------|-------------------------------------------------------------------------------------------------------------------------------------------------------------------------------------------------------------------------------------------------------------------------------------|
|  |                              |     |     |    |                                                                                                                                                                                                                                                                                                                                                                                                                                                                                                                                                                                                                                                                                                                                                                                                                                                                                                                | NUBPL, NUDT2, PMP22, SLC25A30, TDRKH                                                                                                                                                                                                                                                |
|  | L7 <sub>2</sub> (Con vs Inf) | 219 | 181 | 38 | <p>ABAT, ACAD8, ACAD9, ACAT1, ACRY, ACOT7, ACOT9, ADCK2, AIFM1, ARF5, ATP5C1, ATP5G3, AURKAIP1, BAK1, BRIP1, C12orf10, C15orf48, C1QBP, CCDC51, CCDC58, CCDC90B, CCT7, CHCHD4, CHCHD6, CHDH, CISD1, CISD2, CLPX, COQ3, COX11, COX17, COX6B1, COX7C, CRY1, CS, CYB5R2, CYCS, DBI, DLAT, DLST, DNA2, DNAJC15, DUT, ELAC2, ETFA, FASTKD2, FPGS, GAPDH, GARS, GCDH, GCSH, GOT2, GPAM, GPI, GPX4, GSR, GSTO1, GSTZ1, HADHA, HCCS, HEBP1, HEMK1, HSDL1, HSDL2, HSPA9, HSPD1, IDE, IMMT, LDHB, LONP1, LRPPRC, MADD, METTL8, MGME1, MMAB, MRPL14, MRPL15, MRPL22, MRPL23, MRPL24, MRPL27, MRPL32, MRPL37, MRPL4, MRPL42, MRPL47, MRPL48, MRPL50, MRPL53, MRPL57, MRPL9, MRPS10, MRPS14, MRPS18A, MRPS22, MRPS23, MRPS26, MRPS35, MRPS9, MTERF2, MTFMT, MTHFD1, MTHFD1L, MTIF2, MTX2, NARS2, NDUFA8, NDUFA9, NDUFAB1, NDUFB9, NDUFV3, NT5DC3, OGG1, OXCT1, OXNAD1, PAICS, PARK7, PC, PDE12, PDHA1, PHB, PHB2, PIF1,</p> | <p>AASS, ACO1, ACSS1, ACSS3, AIFM2, AK4, ATP10D, BCL2, CHCHD10, CLIC4, CROT, CYB5A, CYP11A1, DCAKD, DDAH1, ECHDC3, EPHX2, FAM210B, FKBP10, HAGH, IVD, LAMC1, MCEE, MCU, ME3, MSRB3, PDK3, PDK4, PDPR, PMP22, PPM1K, PRSS35, SLC16A7, SLC25A30, SLC25A43, SNAP29, TXNRD1, TYSND1</p> |

|  |                                           |     |     |    |                                                                                                                                                                                                                                                                                                                                                                                                                                                                |                                                                                                                                                                                          |
|--|-------------------------------------------|-----|-----|----|----------------------------------------------------------------------------------------------------------------------------------------------------------------------------------------------------------------------------------------------------------------------------------------------------------------------------------------------------------------------------------------------------------------------------------------------------------------|------------------------------------------------------------------------------------------------------------------------------------------------------------------------------------------|
|  |                                           |     |     |    | <p>PMPCA, PNPT1, PPIF, PRELID1, PRELID3B, PTC2, PTC3, PTRH2, PTS, RAB24, RARS2, RMDN1, RTN4IP1, SAMM50, SARS, SDHA, SDHAF2, SFXN5, SHMT1, SIRT4, SLC25A13, SLC25A15, SLC25A17, SLC25A24, SLC25A32, SLC25A38, SLC25A39, SLC25A4, SLC25A47, SOD1, SSBP1, STOM, SUCLG2, SURF1, SYNJ2BP, TAMM41, TARS, TBRG4, TIMM44, TIMM8A, TKT, TMEM126A, TMEM70, TPI1, TRAP1, TRMT10C, TRMT2B, TRMT61B, TSPO, TWNK, UNG, UQCC1, UQCRC1, UQCRC2, UQCRH, USMG5, VDAC2, WARS2</p> |                                                                                                                                                                                          |
|  | Con (L6 <sub>3</sub> vs L7 <sub>2</sub> ) | 33  | 9   | 24 | <p>ABCD2, C15orf48, CMPK2, HEBP1, HK2, HSPB7, PPM1K, STOML1, VDAC1</p>                                                                                                                                                                                                                                                                                                                                                                                         | <p>ACAA2, ACSS3, AGMAT, ALDH7A1, AMACR, ATP5I, COX7C, GLDC, HINT2, HSD17B4, HSDL2, LYRM7, MRPL17, MRPL50, MRPS36, NADK2, NDUFAF2, NDUFS4, NUDT2, PPWD1, SECISBP2, STAR, TARS, THNSL1</p> |
|  | Inf (L6 <sub>3</sub> vs L7 <sub>2</sub> ) | 221 | 188 | 33 | <p>ACAD9, ACAT1, ACOT9, AGK, AK2, ARF5, ATP5B, ATP5C1, ATP5G3, ATP5S, AURKAIP1, BAK1, BCL2L1, BNIP3, C15orf48, C1QBP, CCDC58, CCT7, CHCHD2, CHCHD4, CHCHD6, CHDH,</p>                                                                                                                                                                                                                                                                                          | <p>AASS, ACSF2, ACSS1, ACSS3, AK4, ATP10D, DAH1, DUSP26, ECHDC3, FAM210B, FECH, FKBP10, GLDC, IVD, KIF1B, LAMC1, LETM2,</p>                                                              |

|  |  |  |  |                                                                                                                                                                                                                                                                                                                                                                                                                                                                                                                                                                                                                                                                                                                                                                                                                                                                                                                                                          |                                                                                                                           |
|--|--|--|--|----------------------------------------------------------------------------------------------------------------------------------------------------------------------------------------------------------------------------------------------------------------------------------------------------------------------------------------------------------------------------------------------------------------------------------------------------------------------------------------------------------------------------------------------------------------------------------------------------------------------------------------------------------------------------------------------------------------------------------------------------------------------------------------------------------------------------------------------------------------------------------------------------------------------------------------------------------|---------------------------------------------------------------------------------------------------------------------------|
|  |  |  |  | <p>CISD1, CISD2, CMPK2, COX11, COX17, COX4I1, COX5A, COX6B1, COX7A2, CPOX, CS, CYB5B, CYB5R2, CYCS, DBI, DECR1, DHCR24, DHRSX, DLST, DNA2, DNAJC15, DNMI1L, DUT, ECI1, ECI2, ETFA, FASTKD2, FDPS, FPGS, GAPDH, GARS, GCSH, GFER, GOT2, GPI, GRPEL1, GSR, GSTO1, GSTZ1, GTPBP10, GTPBP3, HADHA, HADHB, HEBP1, HK2, HSPA9, HSPD1, IDE, IMMT, ISCU, LDHB, LONP1, LRPPRC, MADD, MDH1, MDH2, MECR, METTL8, MGME1, MGST1, MIPEP, MLH1, MRPL14, MRPL15, MRPL23, MRPL24, MRPL3, MRPL37, MRPL38, MRPL4, MRPL42, MRPL46, MRPL47, MRPL48, MRPL53, MRPS14, MRPS18A, MRPS22, MRPS23, MRPS25, MRPS26, MRPS28, MRPS31, MRPS33, MRPS35, MRPS5, MRPS9, MTHFD1, MTHFD1L, MTHFD2, MTIF2, MTX2, NDUFA8, NDUFAB1, NDUFB1, NDUFB3, NDUFB4, NDUFB5, NDUFB8, NDUFB9, NDUFS6, NDUFV3, NT5DC3, NUBPL, OGG1, OSBPL1A, PAICS, PAK5, PARK7, PDE12, PDHA1, PHB, PHB2, PIF1, PRELID1, PRELID3B, PSMA6, PTC3, PTS, PYCR1, RAB24, SAMM50, SARS, SDHA, SDHAF2, SFXN5, SIRT5, SLC25A11,</p> | <p>MAOA, MCU, ME3, MSRB3, NUDT19, PDPR, PMP22, POLG2, PRSS35, SARDH, SERHL2, SFXN3, SLC25A25, SLC25A43, TXNRD1, ZADH2</p> |
|--|--|--|--|----------------------------------------------------------------------------------------------------------------------------------------------------------------------------------------------------------------------------------------------------------------------------------------------------------------------------------------------------------------------------------------------------------------------------------------------------------------------------------------------------------------------------------------------------------------------------------------------------------------------------------------------------------------------------------------------------------------------------------------------------------------------------------------------------------------------------------------------------------------------------------------------------------------------------------------------------------|---------------------------------------------------------------------------------------------------------------------------|

|        |                                              |   |   |   |                                                                                                                                                                                                                                                                                                                         |             |
|--------|----------------------------------------------|---|---|---|-------------------------------------------------------------------------------------------------------------------------------------------------------------------------------------------------------------------------------------------------------------------------------------------------------------------------|-------------|
|        |                                              |   |   |   | SLC25A13, SLC25A15, SLC25A17, SLC25A38, SLC25A39,<br>SLC25A4, SLC25A47, SOD1, SSBP1, STOM, STOML1, SUCLG2,<br>SUPV3L1, SYNJ2BP, TCIRG1, TFAM, TIMM13, TIMM44, TIMM8A,<br>TIMMDC1, TKT, TMEM126A, TMEM70, TOMM22, TPI1, TRAP1,<br>TRMT10C, TRMT11, TSPO, TWNK, UNG, UQCC1, UQCR10,<br>UQCRB, UQCRC1, UQCRH, VDAC1, VDAC2 |             |
| Thymus | L6 <sub>3</sub> (Con<br>vs Inf)              | 3 | 1 | 2 | AMN                                                                                                                                                                                                                                                                                                                     | SUOX, TDRKH |
|        | L7 <sub>2</sub> (Con<br>vs Inf)              | 5 | 4 | 1 | ACOT9, C15orf48, OSBPL1A, STOM                                                                                                                                                                                                                                                                                          | TDRKH       |
|        | Con (L6 <sub>3</sub><br>vs L7 <sub>2</sub> ) | 0 | 0 | 0 |                                                                                                                                                                                                                                                                                                                         |             |
|        | Inf (L6 <sub>3</sub><br>vs L7 <sub>2</sub> ) | 4 | 4 | 0 | ACOT9, C15orf48, STOM, STOML1                                                                                                                                                                                                                                                                                           |             |

\* Genes showing a false discovery rate (FDR) ≤ 0.1 were considered differentially expressed genes (DEGs).



**Table S2. The canonical pathways and p value predicted with Ingenuity Pathway Analysis (IPA) analysis in bursa of Fabricius using the differentially expressed MitoProteome genes.**

| No. | Canonical Pathway                                           | Bursa_L6 <sub>3</sub><br>(Con vs Inf) | Bursa_L7 <sub>2</sub><br>(Con vs Inf) | Bursa_Con<br>(L6 <sub>3</sub> vs L7 <sub>2</sub> ) | Bursa_Inf<br>(L6 <sub>3</sub> vs L7 <sub>2</sub> ) |
|-----|-------------------------------------------------------------|---------------------------------------|---------------------------------------|----------------------------------------------------|----------------------------------------------------|
| 1   | Sirtuin Signaling Pathway                                   | 1.89                                  | 4.83                                  | 6.53                                               | 4.31                                               |
| 2   | Mitochondrial Dysfunction                                   | 1.01                                  | 7.76                                  | 3.84                                               | 3.22                                               |
| 3   | Oxidative Phosphorylation                                   | 1.20                                  | 2.08                                  | 4.60                                               | 0.66                                               |
| 4   | Induction of Apoptosis by HIV1                              | 1.44                                  | 2.79                                  |                                                    | 2.07                                               |
| 5   | Folate Polyglutamylation                                    |                                       | 3.85                                  | 2.11                                               |                                                    |
| 6   | Mitochondrial L-carnitine Shuttle Pathway                   |                                       | 2.73                                  | 1.58                                               | 1.42                                               |
| 7   | Glycine Degradation (Creatine Biosynthesis)                 | 2.92                                  |                                       |                                                    | 2.34                                               |
| 8   | Fatty Acid $\beta$ -oxidation I                             |                                       | 2.19                                  | 1.31                                               | 1.15                                               |
| 9   | Stearate Biosynthesis I (Animals)                           |                                       | 1.92                                  | 2.66                                               |                                                    |
| 10  | L-DOPA Degradation                                          |                                       | 2.12                                  |                                                    | 2.34                                               |
| 11  | Death Receptor Signaling                                    | 1.26                                  | 1.31                                  |                                                    | 1.73                                               |
| 12  | Valine Degradation I                                        |                                       | 1.18                                  | 1.55                                               | 1.40                                               |
| 13  | Docosahexaenoic Acid (DHA) Signaling                        |                                       | 2.99                                  |                                                    | 0.95                                               |
| 14  | Aryl Hydrocarbon Receptor Signaling                         | 1.09                                  | 0.38                                  |                                                    | 2.40                                               |
| 15  | Fatty Acid $\beta$ -oxidation III (Unsaturated, Odd Number) |                                       | 1.82                                  |                                                    | 2.04                                               |
| 16  | Geranylgeranyldiphosphate Biosynthesis                      |                                       | 1.82                                  |                                                    | 2.04                                               |
| 17  | Glutathione Redox Reactions I                               |                                       | 2.43                                  |                                                    | 1.28                                               |
| 18  | Glycine Cleavage Complex                                    |                                       | 1.65                                  | 2.03                                               |                                                    |
| 19  | Trans, trans-farnesyl Diphosphate Biosynthesis              |                                       | 1.73                                  |                                                    | 1.95                                               |
| 20  | Trehalose Degradation II (Trehalase)                        |                                       | 1.73                                  |                                                    | 1.95                                               |
| 21  | LPS/IL-1 Mediated Inhibition of RXR Function                |                                       | 1.28                                  | 0.53                                               | 1.86                                               |
| 22  | Dopamine Degradation                                        |                                       | 0.88                                  |                                                    | 2.50                                               |
| 23  | Cytotoxic T Lymphocyte-mediated Apoptosis of Target Cells   |                                       | 2.19                                  |                                                    | 1.15                                               |
| 24  | Noradrenaline and Adrenaline Degradation                    |                                       | 0.85                                  |                                                    | 2.43                                               |

|    |                                                                           |      |      |      |      |
|----|---------------------------------------------------------------------------|------|------|------|------|
| 25 | Salvage Pathways of Pyrimidine Deoxyribonucleotides                       |      | 1.52 |      | 1.75 |
| 26 | Small Cell Lung Cancer Signaling                                          |      | 2.38 |      | 0.76 |
| 27 | Acyl-CoA Hydrolysis                                                       |      | 1.35 | 1.73 |      |
| 28 | BER pathway                                                               |      | 1.35 | 1.73 |      |
| 29 | GDP-glucose Biosynthesis                                                  |      | 1.43 |      | 1.65 |
| 30 | Fatty Acid Activation                                                     |      | 1.32 | 1.69 |      |
| 31 | UDP-N-acetyl-D-galactosamine Biosynthesis II                              |      | 1.39 |      | 1.61 |
| 32 | Glucose and Glucose-1-phosphate Degradation                               |      | 1.39 |      | 1.61 |
| 33 | Apoptosis Signaling                                                       |      | 2.24 |      | 0.71 |
| 34 | Bile Acid Biosynthesis, Neutral Pathway                                   |      | 1.32 |      | 1.54 |
| 35 | Isoleucine Degradation I                                                  |      | 1.29 |      | 1.51 |
| 36 | $\gamma$ -linolenate Biosynthesis II (Animals)                            |      | 1.20 | 1.58 |      |
| 37 | Amyotrophic Lateral Sclerosis Signaling                                   |      | 2.06 |      | 0.65 |
| 38 | Type I Diabetes Mellitus Signaling                                        |      | 2.06 |      | 0.65 |
| 39 | PXR/RXR Activation                                                        |      | 0.66 |      | 2.02 |
| 40 | Glutaryl-CoA Degradation                                                  |      | 1.23 |      | 1.45 |
| 41 | Superpathway of Geranylgeranyldiphosphate Biosynthesis I (via Mevalonate) |      | 1.20 |      | 1.42 |
| 42 | NRF2-mediated Oxidative Stress Response                                   |      | 1.40 |      | 1.13 |
| 43 | Creatine-phosphate Biosynthesis                                           | 2.52 |      |      |      |
| 44 | $\beta$ -alanine Degradation I                                            |      |      | 2.50 |      |
| 45 | 4-aminobutyrate Degradation I                                             |      |      | 2.33 |      |
| 46 | Myc Mediated Apoptosis Signaling                                          |      | 1.47 |      | 0.80 |
| 47 | Cardiolipin Biosynthesis II                                               |      | 2.12 |      |      |
| 48 | Glutamine Degradation I                                                   |      | 2.12 |      |      |
| 49 | Glycine Biosynthesis I                                                    |      | 2.12 |      |      |
| 50 | Glutamate Degradation III (via 4-aminobutyrate)                           |      |      | 2.11 |      |
| 51 | OX40 Signaling Pathway                                                    |      | 1.33 |      | 0.73 |
| 52 | Phenylethylamine Degradation I                                            |      |      |      | 2.04 |

|    |                                                          |  |      |  |      |
|----|----------------------------------------------------------|--|------|--|------|
| 53 | TGF- $\beta$ Signaling                                   |  | 1.31 |  | 0.72 |
| 54 | PEDF Signaling                                           |  | 1.31 |  | 0.72 |
| 55 | Glutathione Redox Reactions II                           |  | 1.82 |  |      |
| 56 | Glycerol-3-phosphate Shuttle                             |  | 1.82 |  |      |
| 57 | IL-8 Signaling                                           |  | 1.38 |  | 0.43 |
| 58 | Thioredoxin Pathway                                      |  |      |  | 1.80 |
| 59 | CD27 Signaling in Lymphocytes                            |  | 1.76 |  |      |
| 60 | D-myo-inositol (3,4,5,6)-tetrakisphosphate Biosynthesis  |  | 0.37 |  | 1.38 |
| 61 | D-myo-inositol (1,4,5,6)-Tetrakisphosphate Biosynthesis  |  | 0.37 |  | 1.38 |
| 62 | 2-ketoglutarate Dehydrogenase Complex                    |  | 1.73 |  |      |
| 63 | dTMP De Novo Biosynthesis                                |  | 1.73 |  |      |
| 64 | 3-phosphoinositide Degradation                           |  | 0.34 |  | 1.30 |
| 65 | Glycerol Degradation I                                   |  | 1.65 |  |      |
| 66 | Superpathway of Serine and Glycine Biosynthesis I        |  | 1.58 |  |      |
| 67 | Phenylalanine Degradation IV (Mammalian, via Side Chain) |  |      |  | 1.51 |
| 68 | Folate Transformations I                                 |  | 1.47 |  |      |
| 69 | Leucine Degradation I                                    |  | 1.47 |  |      |
| 70 | Citrulline Biosynthesis                                  |  | 1.47 |  |      |
| 71 | Vitamin-C Transport                                      |  |      |  | 1.45 |
| 72 | Glycine Betaine Degradation                              |  | 1.43 |  |      |
| 73 | Ketolysis                                                |  | 1.43 |  |      |
| 74 | Histamine Degradation                                    |  |      |  | 1.38 |
| 75 | Oxidative Ethanol Degradation III                        |  |      |  | 1.33 |
| 76 | Fatty Acid $\alpha$ -oxidation                           |  |      |  | 1.31 |

Bursa\_L6<sub>3</sub> (Con vs Inf) represents the comparison between the MDV-infected and control birds in line 6<sub>3</sub>.

Bursa\_L7<sub>2</sub> (Con vs Inf) represents the comparison between the MDV-infected and control birds in line 7<sub>2</sub>.

Bursa\_Con (L6<sub>3</sub> vs L7<sub>2</sub>) represents the comparison between the line 6<sub>3</sub> and 7<sub>2</sub> control birds.

Bursa\_Inf (L6<sub>3</sub> vs L7<sub>2</sub>) represents the comparison between the line 6<sub>3</sub> and 7<sub>2</sub> MDV-infected birds.

**Table S3. The canonical pathways and p value predicted with Ingenuity Pathway Analysis (IPA) analysis in the spleen using the differentially expressed MitoProteome genes.**

| No. | Canonical Pathway                                           | Spleen_L6 <sub>3</sub><br>(Con vs Inf) | Spleen_L7 <sub>2</sub><br>(Con vs Inf) | Spleen_Con<br>(L6 <sub>3</sub> vs L7 <sub>2</sub> ) | Spleen_Inf<br>(L6 <sub>3</sub> vs L7 <sub>2</sub> ) |
|-----|-------------------------------------------------------------|----------------------------------------|----------------------------------------|-----------------------------------------------------|-----------------------------------------------------|
| 1   | Mitochondrial Dysfunction                                   | 3.01                                   | 17.17                                  | 2.82                                                | 23.71                                               |
| 2   | Oxidative Phosphorylation                                   | 2.16                                   | 11.87                                  | 0.87                                                | 21.45                                               |
| 3   | Sirtuin Signaling Pathway                                   | 0.54                                   | 9.65                                   | 2.16                                                | 15.56                                               |
| 4   | Folate Polyglutamylation                                    |                                        | 7.47                                   |                                                     | 5.14                                                |
| 5   | Acetate Conversion to Acetyl-CoA                            | 2.34                                   | 3.31                                   | 2.27                                                | 3.31                                                |
| 6   | Glutaryl-CoA Degradation                                    | 1.74                                   | 3.41                                   | 1.67                                                | 3.42                                                |
| 7   | TCA Cycle II (Eukaryotic)                                   |                                        | 4.20                                   |                                                     | 5.66                                                |
| 8   | Gluconeogenesis I                                           | 1.53                                   | 2.78                                   |                                                     | 5.48                                                |
| 9   | Fatty Acid $\beta$ -oxidation I                             | 1.44                                   | 1.46                                   | 3.08                                                | 3.71                                                |
| 10  | Tryptophan Degradation III (Eukaryotic)                     | 1.55                                   | 2.83                                   | 1.48                                                | 2.83                                                |
| 11  | Oxidative Ethanol Degradation III                           | 1.62                                   | 1.81                                   | 3.45                                                | 1.81                                                |
| 12  | Folate Transformations I                                    |                                        | 4.22                                   |                                                     | 4.22                                                |
| 13  | Induction of Apoptosis by HIV1                              | 1.17                                   | 3.62                                   |                                                     | 3.63                                                |
| 14  | Tetrahydrofolate Salvage from 5,10-methenyltetrahydrofolate |                                        | 3.09                                   |                                                     | 5.14                                                |
| 15  | Ethanol Degradation IV                                      | 1.55                                   | 1.66                                   | 3.29                                                | 1.67                                                |
| 16  | 4-aminobutyrate Degradation I                               | 2.46                                   | 3.61                                   |                                                     | 1.57                                                |
| 17  | tRNA Charging                                               |                                        | 4.57                                   | 1.29                                                | 1.31                                                |
| 18  | Histidine Degradation III                                   |                                        | 2.65                                   |                                                     | 4.40                                                |
| 19  | Ethanol Degradation II                                      | 1.38                                   | 1.35                                   | 2.95                                                | 1.35                                                |
| 20  | Glutamate Degradation III (via 4-aminobutyrate)             | 2.24                                   | 3.09                                   |                                                     | 1.35                                                |
| 21  | Ketolysis                                                   |                                        | 4.06                                   |                                                     | 2.45                                                |
| 22  | Glycine Cleavage Complex                                    |                                        | 1.27                                   | 2.10                                                | 2.92                                                |
| 23  | Choline Degradation I                                       |                                        | 1.74                                   | 2.57                                                | 1.74                                                |

|    |                                                                           |      |      |      |      |
|----|---------------------------------------------------------------------------|------|------|------|------|
| 24 | Aspartate Degradation II                                                  |      | 1.21 |      | 4.60 |
| 25 | Valine Degradation I                                                      | 1.69 | 3.26 |      | 0.82 |
| 26 | Isoleucine Degradation I                                                  |      | 3.59 |      | 2.16 |
| 27 | Glycolysis I                                                              |      | 2.78 |      | 2.78 |
| 28 | Superpathway of Cholesterol Biosynthesis                                  |      | 1.57 |      | 3.94 |
| 29 | Superpathway of Geranylgeranyldiphosphate Biosynthesis I (via Mevalonate) |      | 1.99 |      | 3.34 |
| 30 | UDP-N-acetyl-D-galactosamine Biosynthesis II                              |      | 1.02 | 1.83 | 2.37 |
| 31 | Ketogenesis                                                               |      | 2.45 |      | 2.45 |
| 32 | Lysine Degradation II                                                     |      | 1.35 | 2.18 | 1.35 |
| 33 | NRF2-mediated Oxidative Stress Response                                   |      | 1.99 |      | 2.63 |
| 34 | Glutathione Redox Reactions I                                             |      | 1.70 |      | 2.88 |
| 35 | Mevalonate Pathway I                                                      |      | 2.22 |      | 2.22 |
| 36 | $\beta$ -alanine Degradation I                                            | 2.64 | 1.74 |      |      |
| 37 | Apoptosis Signaling                                                       | 0.98 | 1.93 |      | 1.24 |
| 38 | Vitamin-C Transport                                                       |      | 2.04 |      | 2.04 |
| 39 | Parkinson's Signaling                                                     |      | 2.04 |      | 2.04 |
| 40 | Glutathione-mediated Detoxification                                       |      | 1.49 |      | 2.56 |
| 41 | Acetyl-CoA Biosynthesis I (Pyruvate Dehydrogenase Complex)                |      | 2.77 |      | 1.21 |
| 42 | Ubiquinol-10 Biosynthesis (Eukaryotic)                                    | 1.66 | 1.89 |      |      |
| 43 | Trehalose Degradation II (Trehalase)                                      |      |      | 2.18 | 1.35 |
| 44 | Cytotoxic T Lymphocyte-mediated Apoptosis of Target Cells                 | 1.44 | 1.46 |      | 0.60 |
| 45 | Pyrimidine Deoxyribonucleotides De Novo Biosynthesis I                    |      | 1.73 |      | 1.74 |
| 46 | Stearate Biosynthesis I (Animals)                                         |      | 1.21 |      | 2.13 |
| 47 | Heme Biosynthesis from Uroporphyrinogen-III I                             |      |      |      | 3.31 |
| 48 | Fatty Acid $\beta$ -oxidation III (Unsaturated, Odd Number)               |      |      |      | 3.31 |
| 49 | Interferon Signaling                                                      | 1.39 | 1.37 |      | 0.55 |
| 50 | Acyl-CoA Hydrolysis                                                       |      | 2.29 |      | 0.98 |
| 51 | Aspartate Biosynthesis                                                    |      | 1.57 |      | 1.57 |

|    |                                                         |      |      |      |      |
|----|---------------------------------------------------------|------|------|------|------|
| 52 | Glutamate Degradation II                                |      | 1.57 |      | 1.57 |
| 53 | NADH Repair                                             |      | 1.57 |      | 1.57 |
| 54 | Inosine-5'-phosphate Biosynthesis II                    |      | 1.57 |      | 1.57 |
| 55 | 4-hydroxyproline Degradation I                          |      | 1.57 |      | 1.57 |
| 56 | Tetrahydrobiopterin Biosynthesis II                     |      | 1.57 |      | 1.57 |
| 57 | Tetrahydrobiopterin Biosynthesis I                      |      | 1.57 |      | 1.57 |
| 58 | TNFR1 Signaling                                         |      | 1.12 |      | 1.97 |
| 59 | D-myo-inositol (3,4,5,6)-tetrakisphosphate Biosynthesis | 0.81 | 0.42 | 1.80 |      |
| 60 | D-myo-inositol (1,4,5,6)-Tetrakisphosphate Biosynthesis | 0.81 | 0.42 | 1.80 |      |
| 61 | GDP-glucose Biosynthesis                                |      |      | 1.88 | 1.06 |
| 62 | Glutathione Redox Reactions II                          |      | 1.44 |      | 1.44 |
| 63 | L-cysteine Degradation I                                |      | 1.44 |      | 1.44 |
| 64 | Ascorbate Recycling (Cytosolic)                         |      | 1.44 |      | 1.44 |
| 65 | Arsenate Detoxification I (Glutaredoxin)                |      | 1.44 |      | 1.44 |
| 66 | 3-phosphoinositide Degradation                          | 0.78 | 0.37 | 1.72 |      |
| 67 | Glucose and Glucose-1-phosphate Degradation             |      |      | 1.83 | 1.02 |
| 68 | Pregnenolone Biosynthesis                               | 1.86 | 0.98 |      |      |
| 69 | D-myo-inositol-5-phosphate Metabolism                   | 0.77 | 0.36 | 1.70 |      |
| 70 | Huntington's Disease Signaling                          |      | 0.71 |      | 2.09 |
| 71 | 2-ketoglutarate Dehydrogenase Complex                   |      | 1.35 |      | 1.35 |
| 72 | Tyrosine Degradation I                                  |      | 1.35 |      | 1.35 |
| 73 | Histidine Degradation VI                                | 1.76 | 0.89 |      |      |
| 74 | Estrogen Biosynthesis                                   | 1.33 |      | 1.27 |      |
| 75 | Heme Biosynthesis II                                    |      |      |      | 2.55 |
| 76 | 3-phosphoinositide Biosynthesis                         | 0.68 | 0.26 | 1.53 |      |
| 77 | Superpathway of Inositol Phosphate Compounds            | 0.62 | 0.44 | 1.40 |      |
| 78 | Tumoricidal Function of Hepatic Natural Killer Cells    |      | 1.70 |      | 0.71 |
| 79 | Aryl Hydrocarbon Receptor Signaling                     |      |      | 1.82 | 0.43 |
| 80 | Lysine Degradation V                                    |      |      | 2.18 |      |

|     |                                                      |  |      |      |      |
|-----|------------------------------------------------------|--|------|------|------|
| 81  | Acetyl-CoA Biosynthesis III (from Citrate)           |  | 2.04 |      |      |
| 82  | Superpathway of Methionine Degradation               |  | 1.35 |      | 0.54 |
| 83  | Iron homeostasis signaling pathway                   |  | 0.45 |      | 1.44 |
| 84  | NAD Phosphorylation and Dephosphorylation            |  |      | 1.76 |      |
| 85  | Bile Acid Biosynthesis, Neutral Pathway              |  |      | 1.76 |      |
| 86  | Glycine Biosynthesis I                               |  | 1.74 |      |      |
| 87  | CDP-diacylglycerol Biosynthesis I                    |  | 1.70 |      |      |
| 88  | Phosphatidylglycerol Biosynthesis II (Non-plastidic) |  | 1.63 |      |      |
| 89  | Histamine Degradation                                |  |      | 1.60 |      |
| 90  | Methylglyoxal Degradation I                          |  | 1.57 |      |      |
| 91  | Fatty Acid $\alpha$ -oxidation                       |  |      | 1.54 |      |
| 92  | Putrescine Degradation III                           |  |      | 1.52 |      |
| 93  | Tryptophan Degradation X (Mammalian, via Tryptamine) |  |      | 1.48 |      |
| 94  | Geranylgeranyldiphosphate Biosynthesis               |  |      |      | 1.44 |
| 95  | Proline Biosynthesis I                               |  |      |      | 1.44 |
| 96  | Methylmalonyl Pathway                                |  | 1.44 |      |      |
| 97  | Serine Biosynthesis                                  |  |      |      | 1.35 |
| 98  | Trans, trans-farnesyl Diphosphate Biosynthesis       |  |      |      | 1.35 |
| 99  | dTMP De Novo Biosynthesis                            |  | 1.35 |      |      |
| 100 | 2-oxobutanoate Degradation I                         |  | 1.35 |      |      |
| 101 | Dopamine Degradation                                 |  |      | 1.31 |      |

Spleen\_L6<sub>3</sub> (Con vs Inf) represents the comparison between the MDV-infected and control birds in line 6<sub>3</sub>.

Spleen\_L7<sub>2</sub> (Con vs Inf) represents the comparison between the MDV-infected and control birds in line 7<sub>2</sub>.

Spleen\_Con (L6<sub>3</sub> vs L7<sub>2</sub>) represents the comparison between the line 6<sub>3</sub> and 7<sub>2</sub> control birds.

Spleen\_Inf (L6<sub>3</sub> vs L7<sub>2</sub>) represents the comparison between the line 6<sub>3</sub> and 7<sub>2</sub> MDV-infected birds.
